# Supplementary material for: Cerebrospinal fluid findings in patients with myelin oligodendrocyte glycoprotein (MOG) antibodies. Part 1: Results from 163 lumbar punctures in 100 adult patients
Source: PubMed Central journal article supplement (PMC7470615; doi:10.1186/s12974-020-01824-2), 2020-09-03
Supplement: 12974_2020_1824_MOESM1_ESM.pdf [file 12974_2020_1824_MOESM1_ESM.pdf]

|                              | Units                          | Attack MY, first<br>LP/event | Remission MY, last<br>LP/event | Attack ON, first<br>LP/event | Remission ON, last<br>LP/event | Attack BRAIN, first<br>LP/event | Remission BRAIN,<br>last LP/event |
|------------------------------|--------------------------------|------------------------------|--------------------------------|------------------------------|--------------------------------|---------------------------------|-----------------------------------|
| Pleocytosis                  | <i>samples</i>                 | 32/40 (80%)                  | 1/6 (16.7%)                    | 15/50 (30%)                  | 0/6 (0%)                       | 6/10 (60%)                      | 1/3 (33.3%)                       |
| WCC                          | <i>cells/<math>\mu</math>l</i> | 31.5 (1-463;40)              | 1.5 (0-13;6)                   | 3 (0-135;48)                 | 1 (0-3;5)                      | 13.5 (0-68;10)                  | 3 (1-16;3)                        |
| WCC >100/ $\mu$ l            | <i>samples</i>                 | 12/40 (30%)                  | 0/6 (0%)                       | 1/49 (2%)                    | 0/6 (0%)                       | 0/10 (0%)                       | 0/3 (0%)                          |
| OCB                          | <i>samples</i>                 | 3/37 (8.1%)                  | 1/6 (16.7%)                    | 3/48 (6.3%)                  | 0/6 (0%)                       | 2/10 (20%)                      | 0/3 (0%)                          |
| IgG-IF >10%                  | <i>samples</i>                 | 2/35 (5.7%)                  | 0/6 (0%)                       | 2/40 (5%)                    | 0/4 (0%)                       | 0/8 (0%)                        | 0/3 (0%)                          |
| QAlb > Qlim(Alb)             | <i>samples</i>                 | 22/36 (61.1%)                | 2/6 (33.3%)                    | 15/43 (34.9%)                | 1/4 (25%)                      | 4/8 (50%)                       | 0/3 (0%)                          |
| CSF TP elevated              | <i>samples</i>                 | 21/37 (56.8%)                | 1/6 (16.7%)                    | 15/47 (31.9%)                | 1/6 (16.7%)                    | 6/8 (75%)                       | 1/3 (33.3%)                       |
| CSF TP concentrations        | <i>mg/dl</i>                   | 59.5 (20.5-176;34)           | 31.05 (5.11-48.2;6)            | 37.4 (20.8-171.8;43)         | 37.85 (32-59.8;4)              | 48.2 (30.4-74.2;8)              | 40 (20-47;3)                      |
| CSF TP >100 mg/dl            | <i>samples</i>                 | 6/37 (16.2%)                 | 0/6 (0%)                       | 1/47 (2.1%)                  | 0/6 (0%)                       | 0/8 (0%)                        | 0/3 (0%)                          |
| CSF L-lactate elevated       | <i>samples</i>                 | 10/26 (38.5%)                | 0/4 (0%)                       | 6/36 (16.7%)                 | 0/4 (0%)                       | 0/3 (0%)                        | 0/2 (0%)                          |
| CSF L-lactate concentrations | <i>mg/dl</i>                   | 2.14 (1.12-4.43;24)          | 1.45 (1.4-1.9;4)               | 1.7 (1.05-2.68;35)           | 1.7 (1.44-1.74;3)              | 1.51 (1.5-1.7;3)                | 1.51 (1.33-1.69;2)                |
| CSF L-lactate >3 mmol/l      | <i>samples</i>                 | 4/26 (15.4%)                 | 0/4 (0%)                       | 0/36 (0%)                    | 0/4 (0%)                       | 0/3 (0%)                        | 0/2 (0%)                          |
| Time since attack onset      | <i>days</i>                    | 7 (0-31;41)                  | 380.5 (119-3664;6)             | 8.5 (0-34;50)                | 154 (97-275;6)                 | 14 (0-24;11)                    | 191 (117-2624;3)                  |

**Supplementary Table 1.** CSF findings during acute attacks and during remission in the ‘acute MY subgroup’, the ‘acute ON subgroup’ and the ‘acute BRAIN subgroup’ (stratified results from Table 11). BRAIN = brain/brainstem/cerebellar subgroup; CSF = cerebrospinal fluid; IgG-IF = intrathecally produced CSF immunoglobulin G fraction; LP = lumbar puncture; MY = myelitis subgroup; ON = optic neuritis subgroup; QAlb = albumin CSF/serum ratio; TP = total protein; WCC = white cell count.
