# Supplementary material for: Cerebrospinal fluid findings in patients with myelin oligodendrocyte glycoprotein (MOG) antibodies. Part 1: Results from 163 lumbar punctures in 100 adult patients
Source: PubMed Central journal article supplement (PMC7470615; doi:10.1186/s12974-020-01824-2), 2020-09-03
Supplement: 12974_2020_1824_MOESM6_ESM.pdf [file 12974_2020_1824_MOESM6_ESM.pdf]

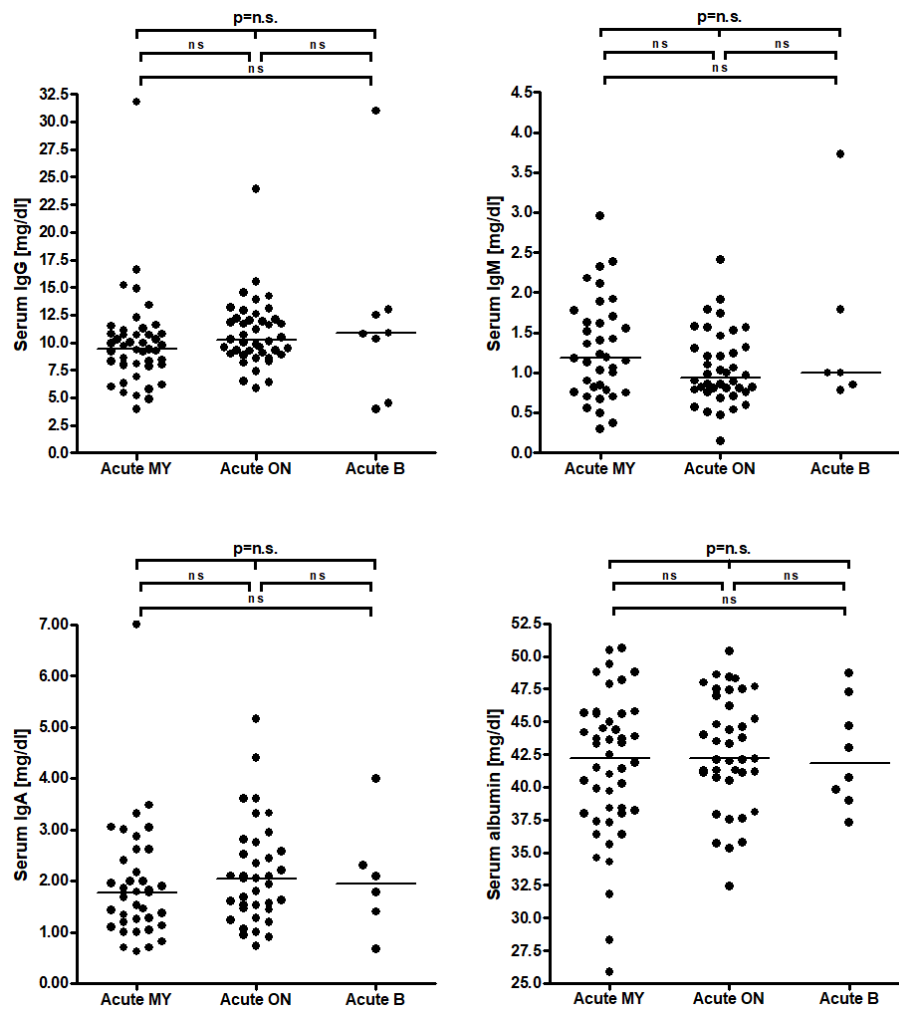

**Supplementary Figure 2.** No statistically significant differences in serum IgG, IgM, IgA and albumin levels between the 'acute MY', the 'acute ON' and the 'acute BRAIN' subgroup. B = brain; CSF = cerebrospinal fluid; MY = myelitis; ON = optic neuritis.
