# Supplementary material for: Cerebrospinal fluid findings in patients with myelin oligodendrocyte glycoprotein (MOG) antibodies. Part 1: Results from 163 lumbar punctures in 100 adult patients
Source: PubMed Central journal article supplement (PMC7470615; doi:10.1186/s12974-020-01824-2), 2020-09-03
Supplement: 12974_2020_1824_MOESM7_ESM.pdf [file 12974_2020_1824_MOESM7_ESM.pdf]

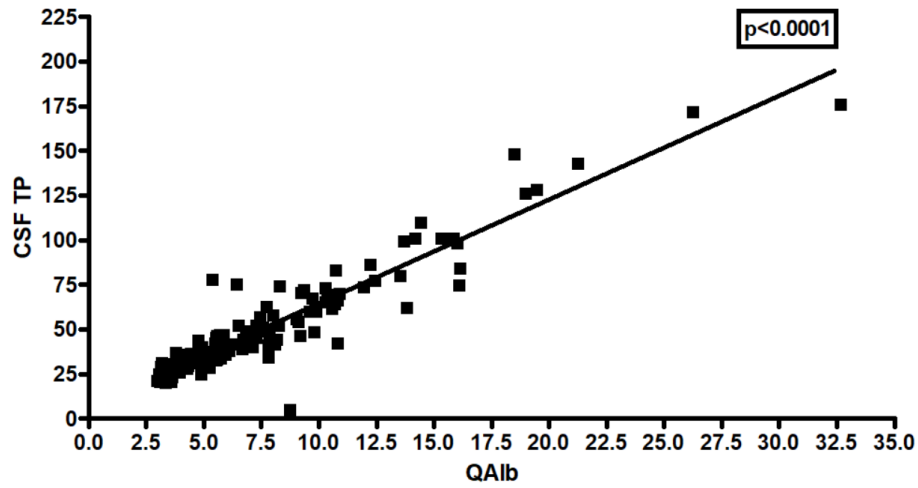

**Supplementary Figure 3.** Regression analysis of QAlb and CSF total protein, demonstrating a close relationship between the two parameters ( $r^2=0.874$ ,  $p<0.00001$ ). CSF = cerebrospinal fluid; QAlb = albumin CSF/serum ratio; TP = total protein.
