# Supplementary material for: Cerebrospinal fluid findings in patients with myelin oligodendrocyte glycoprotein (MOG) antibodies. Part 1: Results from 163 lumbar punctures in 100 adult patients
Source: Springer Nature journal article supplement (doi:10.1186/s12974-020-01824-2), 2020-09-03
Supplement: MOESM2 [file 18345736]

|         | LP #1                                       | LP #2                                       | LP #3                                       | LP #4                        | LP #5                                |
|---------|---------------------------------------------|---------------------------------------------|---------------------------------------------|------------------------------|--------------------------------------|
| Pat. #1 | OCB -/1, M, Rem,<br>QlgG neg                | OCB -/1, M, Rem,<br>QlgG neg                | OCB -/4, M, Rem,<br>QlgG neg                | OCB -/4, M, Rem,<br>QlgG neg | <b>OCB +/2</b> , M, Rem,<br>QlgG neg |
| Pat. #2 | <b>OCB +/2</b> , M, A,<br>QlgG neg          | OCB -/1, M, A,<br>QlgG neg                  |                                             |                              |                                      |
| Pat. #3 | OCB -/1, ON, A,<br>QlgG neg                 | <b>OCB +/2</b> , nd, A?,<br><b>QlgG pos</b> |                                             |                              |                                      |
| Pat. #4 | OCB -/1, ON, A,<br>QlgG n.d.                | OCB -/4, ON, Rem,<br>QlgG neg               |                                             |                              |                                      |
| Pat. #5 | OCB -/1, nd, Rem,<br>QlgG neg               | OCB -/4, M, A,<br>QlgG nd                   | OCB -/4, M, A,<br>QlgG nd                   | OCB -/4, M, A,<br>QlgG nd    | OCB -/1, ON, A,<br>QlgG nd           |
| Pat. #6 | <b>OCB +/3</b> , M+B, A,<br><b>QlgG pos</b> | <b>OCB +/3</b> , M+B, A,<br>QlgG neg        | <b>OCB +/2</b> , M+B, A,<br><b>QlgG pos</b> |                              |                                      |
| Pat. #7 | OCB -/1, ON, A,<br>QlgG neg                 | OCB -/4, M, A,<br>QlgG neg                  |                                             |                              |                                      |
| Pat. #8 | OCB -/1, ON, A,<br>QlgG neg                 | OCB -/4, ON, A,<br>QlgG neg                 |                                             |                              |                                      |
| Pat. #9 | OCB -/4, ON, A,<br>QlgG nd                  | OCB -/1, B, A,<br>QlgG neg                  |                                             |                              |                                      |

**Supplementary Table 2.** Variations in OCB positivity over time. In 1 patient, OCB disappeared over the course of disease (absent one week after the initial LP and following steroid treatment); in 2 patients, OCB were absent in the initial sample but were detectable in a follow-up sample taken 271 and 66 days later, respectively. Most samples were obtained during acute disease with the only exception of patient #1, in whom LP was performed five times during remission. Note that QlgG was normal in most of the OCB-positive samples, indicating low levels of intrathecal IgG synthesis. A = acute attack; B = brain/brainstem/cerebellar disease (last attack before LP); M = myelitis (last attack before LP); OCB = oligoclonal bands; ON = optic neuritis (last attack before LP); QlgG = CSF/serum immunoglobulin G ratio; Rem = remission.
