# Supplementary material for: Cerebrospinal fluid findings in patients with myelin oligodendrocyte glycoprotein (MOG) antibodies. Part 1: Results from 163 lumbar punctures in 100 adult patients
Source: Springer Nature journal article supplement (doi:10.1186/s12974-020-01824-2), 2020-09-03
Supplement: MOESM5 [file 18345736]

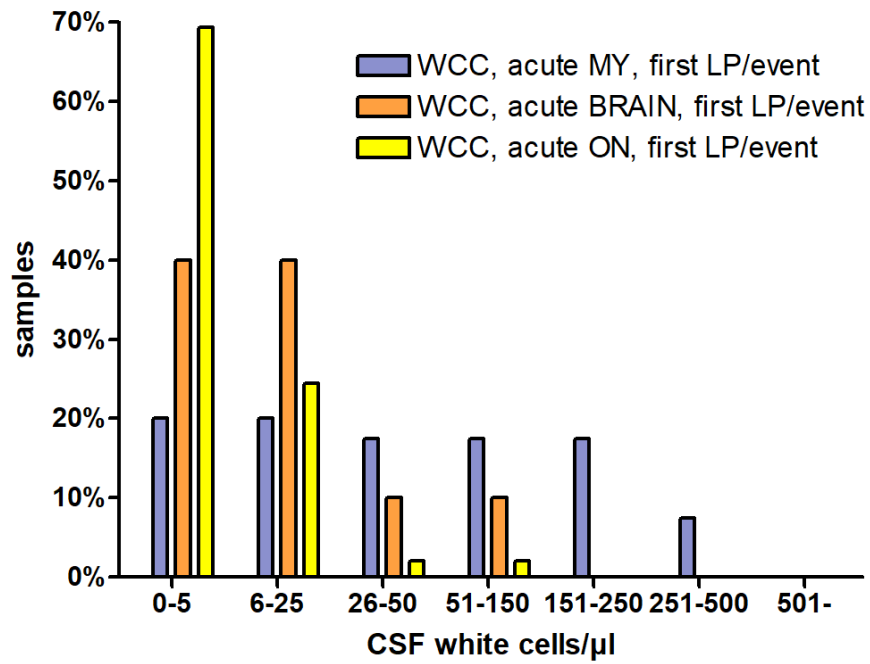

**Supplementary Figure 1.** CSF white cell counts in the 'acute MY subgroup', the 'acute BRAIN subgroup' and the 'acute ON subgroup'.
